# Supplementary material for: Aggregatibacter actinomycetemcomitans Cytolethal Distending Toxin Induces Cellugyrin-(Synaptogyrin 2) Dependent Cellular Senescence in Oral Keratinocytes
Source: MDPI journal article supplement (doi:10.3390/pathogens13020155), 2024-02-08
Supplement: s1 [file s1]

## Supplemental Figures

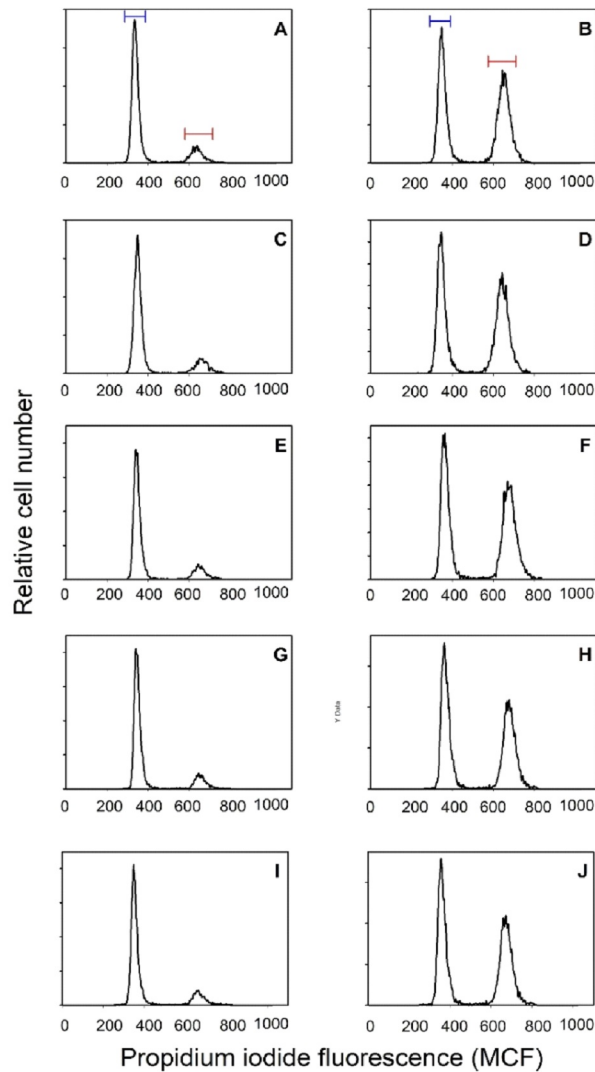

**Figure S1:** Representative histogram profiles are shown for the cell cycle data presented in Fig 1D using propidium iodide fluorescence to determine cell cycle distribution. Panels A, C, E, G, I show representative results of control cells (medium alone) incubated for 3-7 days, respectively. Panels B, D, F, H and J show histogram profiles for cells incubated with Cdt for 3-7 days respectively. Analytical gates used to detect cells in the G0/G1 phases (blue) and G2/M phase (red) are shown in panels A and B. Cells with propidium iodide fluorescence between these two gates were designated as S-phase

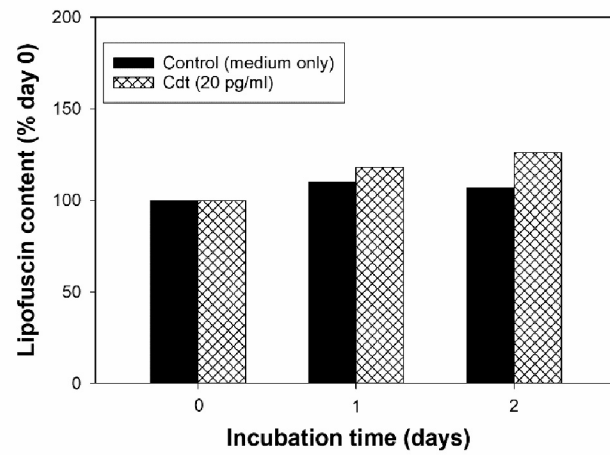

**Figure S2.** Lipofuscin content in TIGK cells at 24 and 48 hrs. TIGK cells were incubated with medium alone or with Cdt (20 pg/ml) for 0, 24 or 48 hr and the lipofuscin content determined as described in Section S2. Data are presented as lipofuscin (MCF) as percentage of day 0 values.

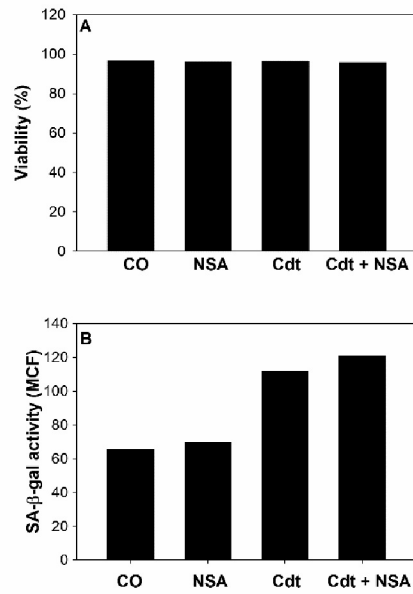

**Figure S3.** Viability and SA-β-gal activity were assessed in TIGK cells exposed to Cdt and NSA. TIGK cells were incubated with medium alone (CO), NSA (1 μM), Cdt (20 pg/ml) or both NSA and Cdt for 72 hrs. Panel A shows the viability of cells at 72 hrs determined by propidium iodide uptake and analyzed by flow cytometry; results are expressed as % viability. Panel B shows the levels of SA-β-gal activity at 72 hr expressed as MCF.

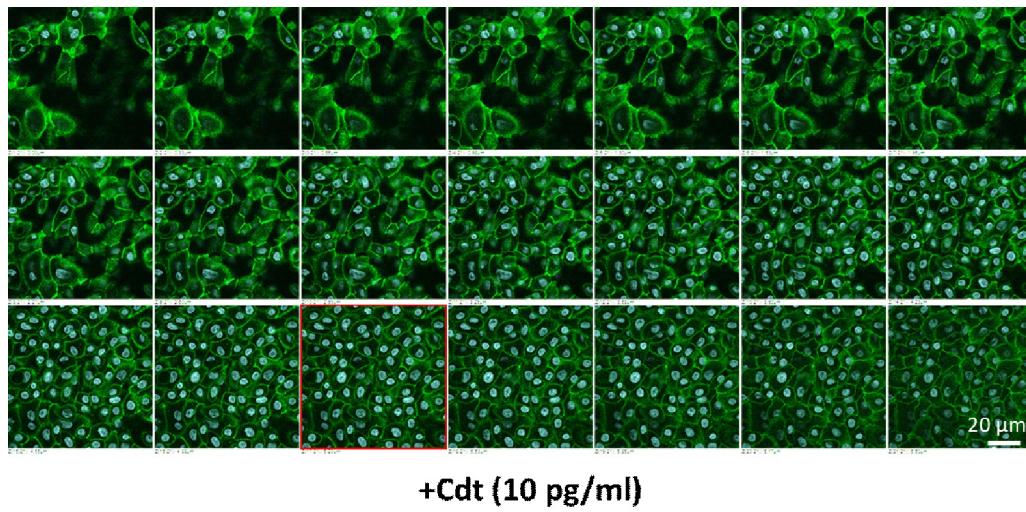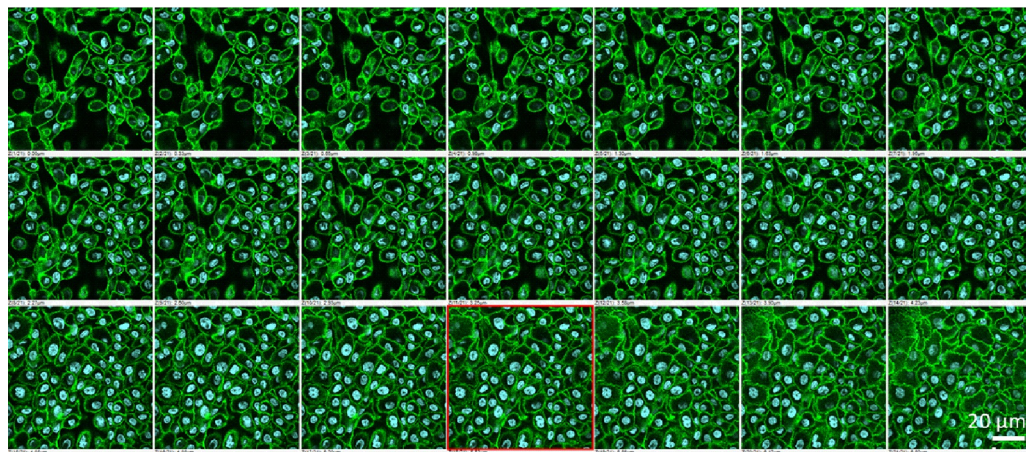

**Figure S4:** Tiled view of the confocal z-scan (step size 0.33  $\mu\text{m}$ ) from control (top) and Cdt (10 pg/ml; bottom) treated PGK immuno-stained for  $\beta$ -catenin (green). Nuclei are pseudo-colored in cyan. Slices shown in Figure 5 have been outlined in red.
